# Supplementary material
Source: Royal Society of Chemistry journal article supplement (doi:10.1039/d6ay00661b)
Supplement: d6ay00661b1.pdf [file d6ay00661b1.pdf]

## Supporting Information

### **Construction of a highly sensitive electrochemical sensing platform using an Au-RGO-MWCNTs nanocomposite for the synergistic amplification of rutin detection**

Ling-Zhi He <sup>a,b</sup>, Xiang Li <sup>a</sup>, Zhi-Wen Zeng <sup>a</sup>, Yang Hong <sup>a</sup>, Qiong-Chi Liu <sup>a</sup>,

Zhong-Hou Liang <sup>a</sup>, Wen-An Kuang <sup>c,\*</sup>

<sup>a</sup> *School of Medicine, Hunan Environment Biological Polytechnic, Hengyang, Hunan, 421005, China*

<sup>b</sup> *Hunan Key Laboratory of Typical Environmental Pollution and Health Hazards, School of Public Health, Hengyang Medical School, University of South China, Hengyang, Hunan, 421001, China*

<sup>c</sup> *The First Affiliated Hospital, Department of Thoracic and Cardiovascular, Hengyang Medical School,*

*University of South China, Hengyang, Hunan, 421001, China*

\* Corresponding author.

E-mail address: ksykyn@126.com (W. Kuang)

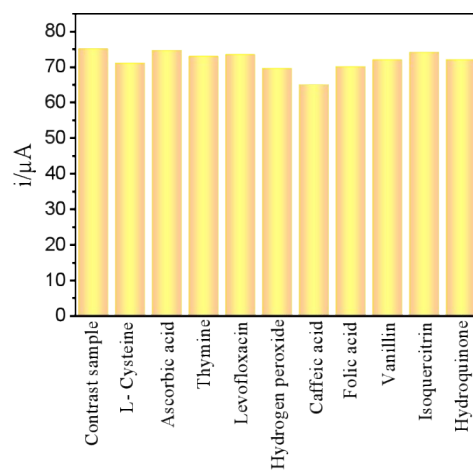

**Fig. S1.** Anti-interference performance evaluation for 1.0 mmol L<sup>-1</sup> rutin detection in the presence of 100-fold excess biological/environmental interferents.

**Table S1.** Comparison of the performance of different electrochemical methods for the determination of rutin.

| Methods               | Detection range<br>( $\mu\text{mol L}^{-1}$ ) | LOD<br>( $\mu\text{mol L}^{-1}$ ) | Recovery (%)  | Reference |
|-----------------------|-----------------------------------------------|-----------------------------------|---------------|-----------|
| DPV <sup>a</sup>      | 4.77–46.2                                     | 1.54                              | 96.9–104.6%   | 1         |
| DPV                   | 20–5000                                       | 10                                | –             | 2         |
| sequential injection  | 3.0–30                                        | 2.25                              | –             | 3         |
| HPLC–UV <sup>b</sup>  | 16.3–98.27                                    | 3.0                               | –             | 4         |
| FI–CL <sup>c</sup>    | –                                             | 3.0                               | –             | 5         |
| HPLC–DAD <sup>d</sup> | 98.3–294.8                                    | 10.4                              | 98.33–101.12% | 6         |
| SWV <sup>e</sup>      | 8–1000                                        | 1.30                              | 92.0–102.0%   | This work |

<sup>a</sup>DPV: differential pulse voltammetry; <sup>b</sup>HPLC–UV:High-performance liquid chromatography-ultraviolet; <sup>c</sup>FI–CL:flow-injection chemiluminescence method; <sup>d</sup>HPLC–DAD:a high-performance liquid chromatography with diode-array detection; <sup>e</sup>SWV: square wave voltammograms.

**Table S2.** Comparison of rutin detection in real samples using the proposed Au-RGO-MWCNTs/GCE and HPLC method (n = 3).

| Sample                         | Detected by SWV<br>( $\mu\text{mol L}^{-1}$ ) | Detected by HPLC<br>( $\mu\text{mol L}^{-1}$ ) | Relative<br>Error (%) |
|--------------------------------|-----------------------------------------------|------------------------------------------------|-----------------------|
| Hypericum<br>japonicum Thunb   | 48.0                                          | 49.1                                           | 2.24%                 |
| Sophora japonica               | 82.6                                          | 79.9                                           | 3.38%                 |
| Fagopyrum<br>esculentum Moench | 68.3                                          | 69.5                                           | 1.73%                 |

HPLC analysis was conducted using (C18 column ,  $4.6 \times 250$  mm,  $5 \mu\text{m}$ ) with methanol-0.1% phosphoric acid solution (40:60, v/v) as mobile phase at a flow rate of  $1.0 \text{ mL min}^{-1}$  with UV detection at 254 nm.

Values are expressed as mean  $\pm$  standard deviation (SD) for three parallel measurements (n = 3). Relative error (%) was calculated as:  $[(\text{SWV value} - \text{HPLC value}) / \text{HPLC value}] \times 100\%$ .

## References

- 1 A. C. Franzoi, P. Migowski, J. Dupont and I. C. Vieira, *Anal. Chim. Acta*, 2009, 639, 90-95.
- 2 S. Jinchun, Y. Ji, Z. Junfen, T. Juan and Z. Li, *Microchim. Acta*, 2010, 171, 283-287.
- 3 Z. Legnerová, D. Šatí, x, nský and P. Solich, *Anal. Chim. Acta*, 2003, 497, 165-174.
- 4 E. A. A.-S. Mohammed khair, V. M. Yuliia, A. D. Tatyana, B. V. Andriy, A. Vasil and R. B. Yaroslav, *J. Pharm. Biomed. Anal.*, 2018, 149, 179-184.
- 5 Y. Dan, L. Haiyun, L. Ziyuan, H. Zaibin and L. Jianping, *Luminescence*, 2010, 25, 436-444.
- 6 L. F. Lloyd Earl, T. C.-I. Katherine Ann, P. R. Joel, P. T. Arvin Paul and B. H.-F. Amelia, *Malays. J. Fundam. Appl.*, 2023, 19, 855-864.
